# Supplementary material for: Evaluation of DESS as a storage medium for microbial community analysis
Source: PubMed Central journal article supplement (PMC6368006; doi:10.7717/peerj.6414), 2019-02-05

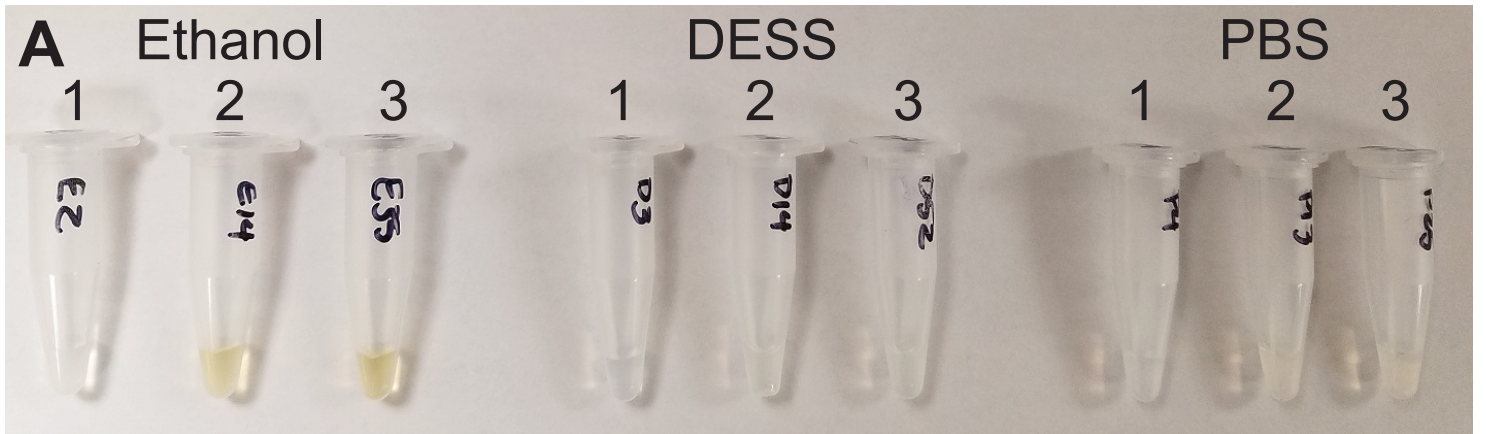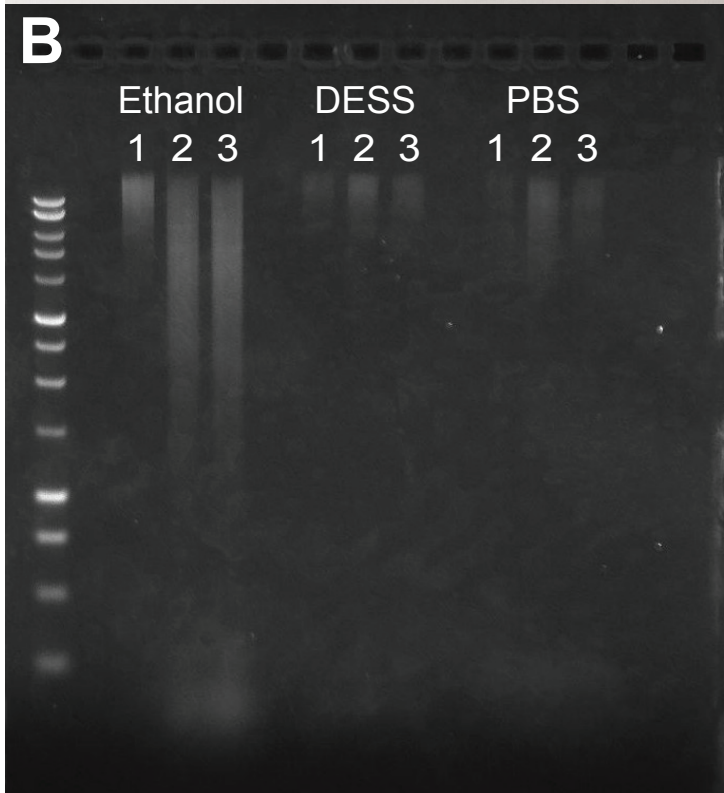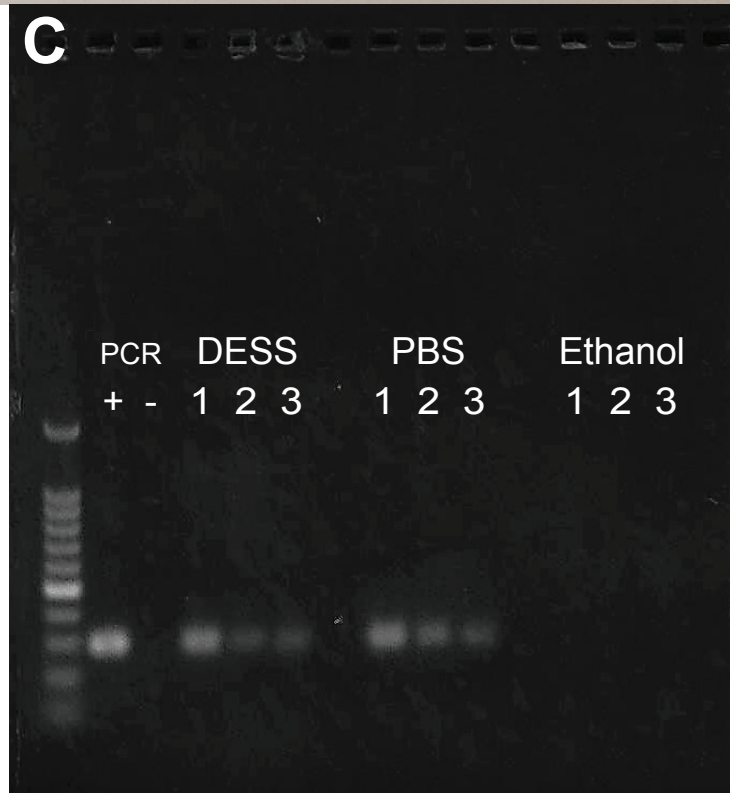

Supplement: peerj-07-6414-s002.pdf [file peerj-07-6414-s002.pdf]
